# Supplementary material for: Iron to catalyze ammonia synthesis at low temperature
Source: Research Square preprint supplement (doi:10.21203/rs.3.rs-1426351/v1), 2022-04-12
Supplement: Supplementary file 1 [file c03f5e7c93ebda64f4a8e807.docx]

**
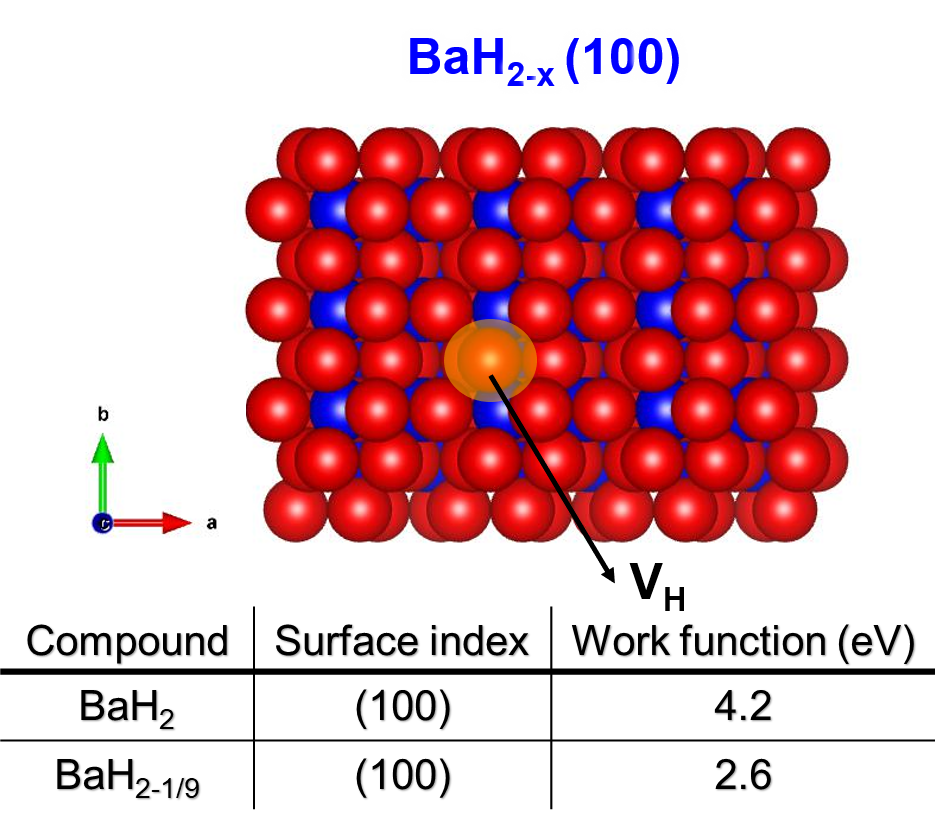
**

**Extended Data Fig. 1| DFT results for BaH2 with H− defects.** DFT calculations revealed that the (100) surface is the most stable in BaH2.The work function of BaH2 with H− defectsthat trap electrons was estimated to be 2.6 eV.


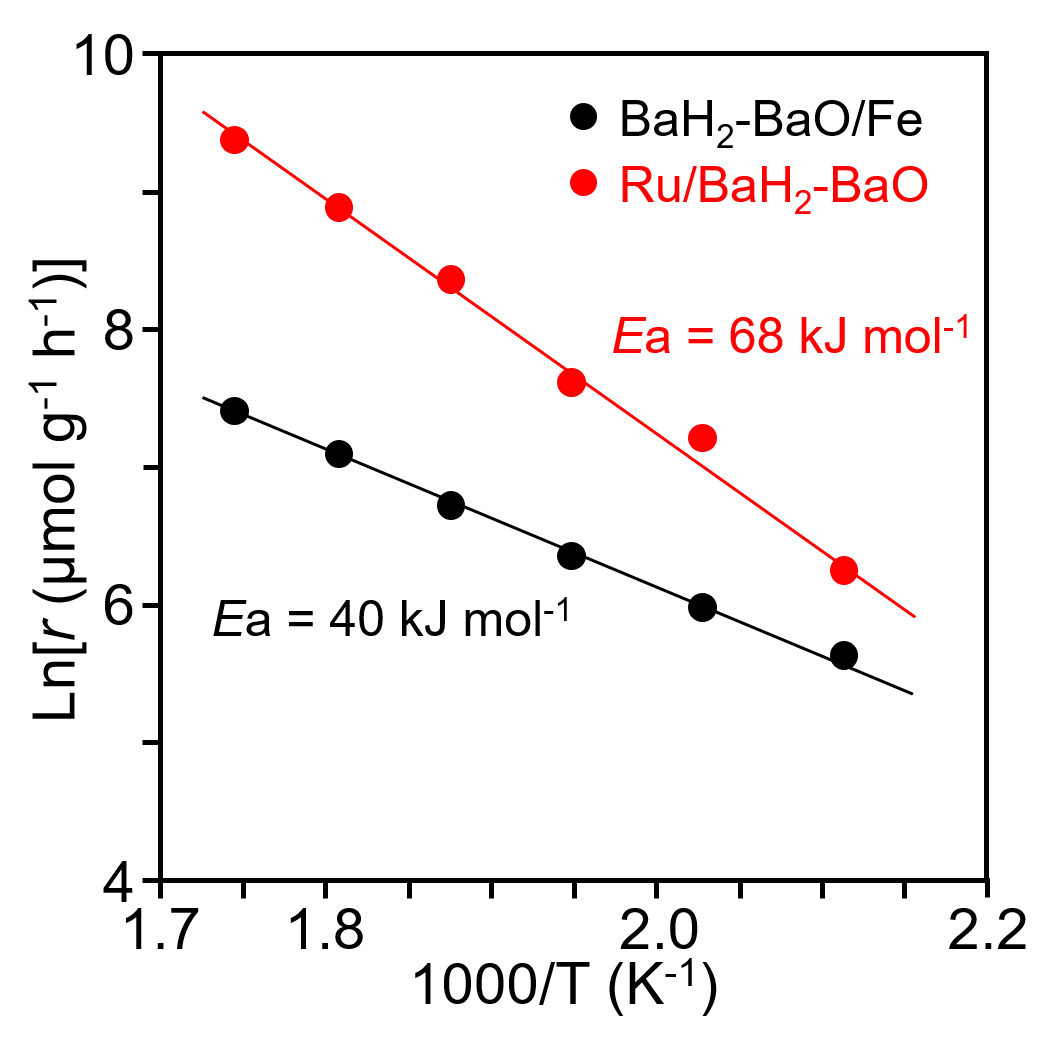


**Extended Data Fig. 2| The Arrhenius plots for ammonia synthesis activity of the BaH2-BaO/Fe and Ru/BaH2-BaO at 0.9 MPa.** The apparent activation energy of BaH2-BaO/Fe and Ru/BaH2-BaOwas 40 kJ mol‒1 and 68 kJ mol‒1, respectively.


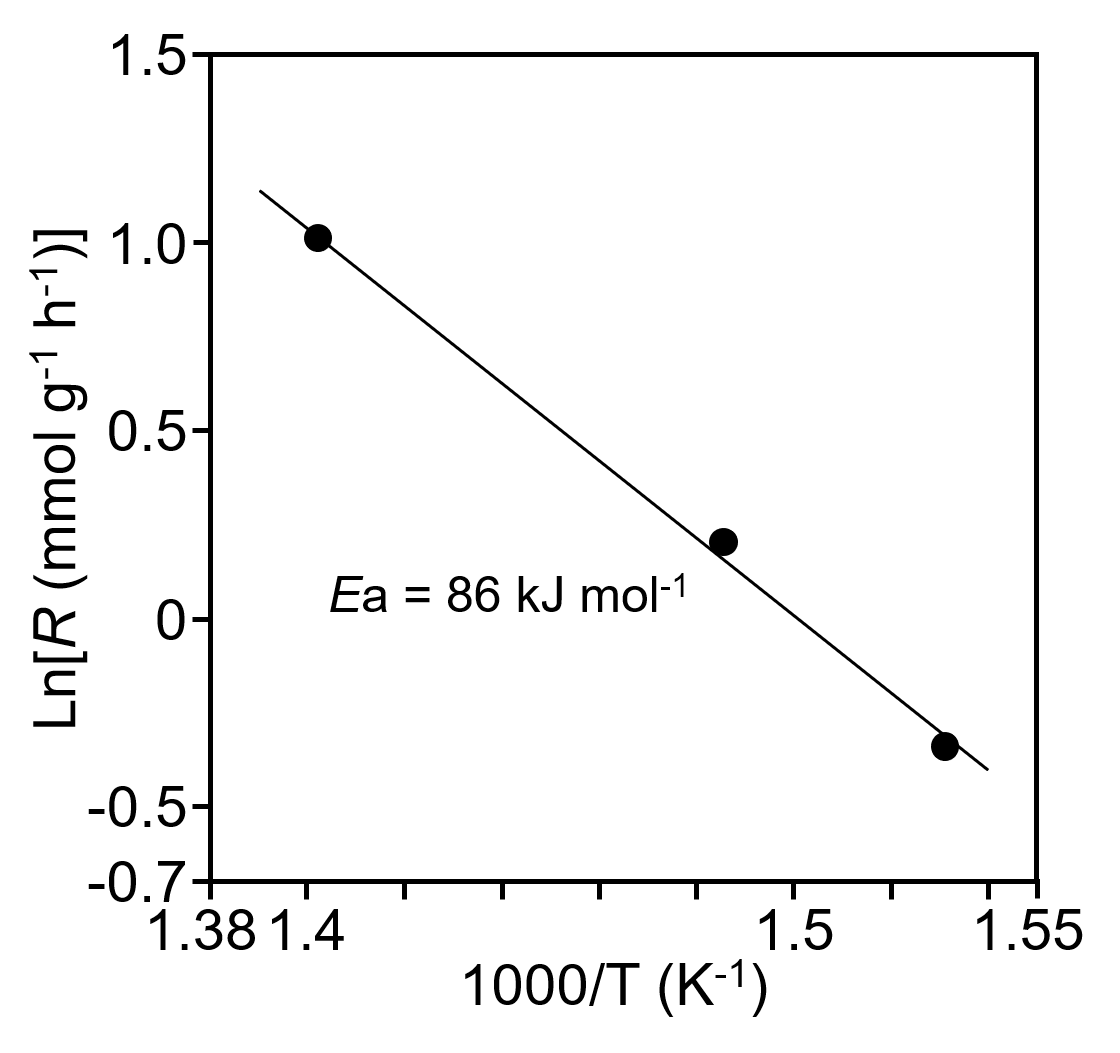


**Extended Data Fig. 3| The Arrhenius plots for 14N2-15N2 isotropic exchange reaction over the BaO-BaH2/Fe.** The apparent activation energy was about 86 kJ mol-1.

**Extended Data Table 1| Catalytic activities of various transition metals for ammonia synthesis (300 °C)**

| Catalysts | *S*BET  (m2 g–1) | Metal particle size (nm) | Pressure  (MPa) | WHSV  (mL g–1 h–1) | rNH3  (mmol g–1 h–1) | Ref. |
| --- | --- | --- | --- | --- | --- | --- |
| BaH2-BaO /Fe | 7 | 21.7 | 0.9 | 36000 | 5.5 | This work |
| Promoted Fe | - | - | 0.9 | 36000 | 5.4 | 8 |
|  |  |  | 0.9 | 60000 | 9.0*a* |  |
|  |  |  | 0.9 | 72000 | 10.8*a* |  |
| Ru (10%)/BaO-BaH2 | 20 | 4.0 | 0.9 | 36000 | 11.5 | This work |
| Ru (10%)/Ba-Ca(NH2)2 | 101 | 2.7 | 0.9 | 36000 | 23.3 | 8 |
| Cs-Ru (10%)/MgO | 12 | 5.2 | 0.9 | 36000 | 0.6 | 8 |
| Ru (2%)/C12A7:e‒ | 1 | 28.7 | 0.9 | 36000 | 0.8 | 8 |
| Fe-LiH | 16 | 29.6 | 1.0 | 60000 | 4.4 | 9 |
| Co-LiH | 43 | 27.6 | 1.0 | 60000 | 4.7 | 9 |
| BaH2-Co/CHTs | 53 | 42.0 | 1.0 | 60000 | 4.8 | 10 |
| Ru/La0.5Ce0.5O1.75 | 42 | 1.7 | 1.0 | 72000 | 10.7 | 16 |
| Ru/La0.5Pr0.5O1.75 | 30 | 2.9 | 1.0 | 72000 | 8.9 | 17 |

*a*Ammonia formation rate estimated based on rNH3 at the WHSV at 36000 mL g–1 h–1.

**Extended Data Table 2| TOF for ammonia synthesis on various transition metal catalysts**

| Catalysts | Temperature (°C) | Pressure  (MPa) | TOF  (s–1) | Ea  (kJ mol-1) | Ref. |
| --- | --- | --- | --- | --- | --- |
| BaO-BaH2/Fe*a* | 300 | 0.9 | 12.2 | 40 | This work |
|  | 200 |  | 1.7 |  | This work |
|  | 100 |  | 0.2 |  | This work |
| Ru (10%)/BaO-BaH2*a* | 300 | 0.9 | 3.5x10-3 | 69 | This work |
|  | 200 |  | 3.2x10-4 |  | This work |
|  | 100 |  | - |  | This work |
| Ru (10%)/Ba-Ca(NH2)2*b* | 300 | 0.9 | 1.3x10-2 | 59 | 8 |
| Cs-Ru (10%)/MgO*a* | 300 | 0.9 | 8.0x10-4 | 124 | 8 |
| Ru/C12A7:e‒*a* | 300 | 0.9 | 5.6x10-2 | 49 | 8 |
| Co/C12A7:e‒*b* | 400 | 0.9 | 9.3x10-3 | 50 | 30 |
| Ni/LaN bulk*a* | 400 | 0.9 | 0.17 | 60 | 11 |

*a*TOF calculated from the rate of ammonia synthesis divided by the number of surface *N*s.

*b*TOF calculated from the rate of ammonia synthesis divided by the number of surface metal sites calculated, on the basis of the morphological mean particle sizes of transition metal particles. .
